# Supplementary material for: Present state of the Aral Sea: diverging physical and biological characteristics of the residual basins
Source: PubMed Central journal article supplement (PMC4817148; doi:10.1038/srep23906), 2016-04-01
Supplement: srep23906-s1.pdf [file srep23906-s1.pdf]

## Supplementary Information

### PRESENT STATE OF THE ARAL SEA: DIVERGING PHYSICAL AND BIOLOGICAL CHARACTERISTICS OF THE RESIDUAL BASINS

**A.S.Izhitskiy\*<sup>1</sup>, P.O. Zavialov<sup>1</sup>, P.V. Sapozhnikov<sup>1</sup>, G.B. Kirillin<sup>2</sup>, H.P. Grossart<sup>2,5</sup>, O.Y.Kalinina<sup>1,3</sup>, A.K. Zalota<sup>1</sup>, I.V. Goncharenko<sup>1</sup>, A.K. Kurbaniyazov<sup>4</sup>**

<sup>1</sup>Shirshov Institute of Oceanology Russian Academy of Science, Moscow, Russian Federation

<sup>2</sup>Leibniz-Institute of Freshwater Ecology and Inland Fisheries, Berlin, Germany

<sup>3</sup>Faculty of Geography, Lomonosov Moscow State University, Moscow, Russian Federation

<sup>4</sup>Yasavi International Kazakh-Turkish University, Turkestan, Kazakhstan

<sup>5</sup>Institute of Biochemistry and Biology, Potsdam University, Germany

## Supplementary Figures

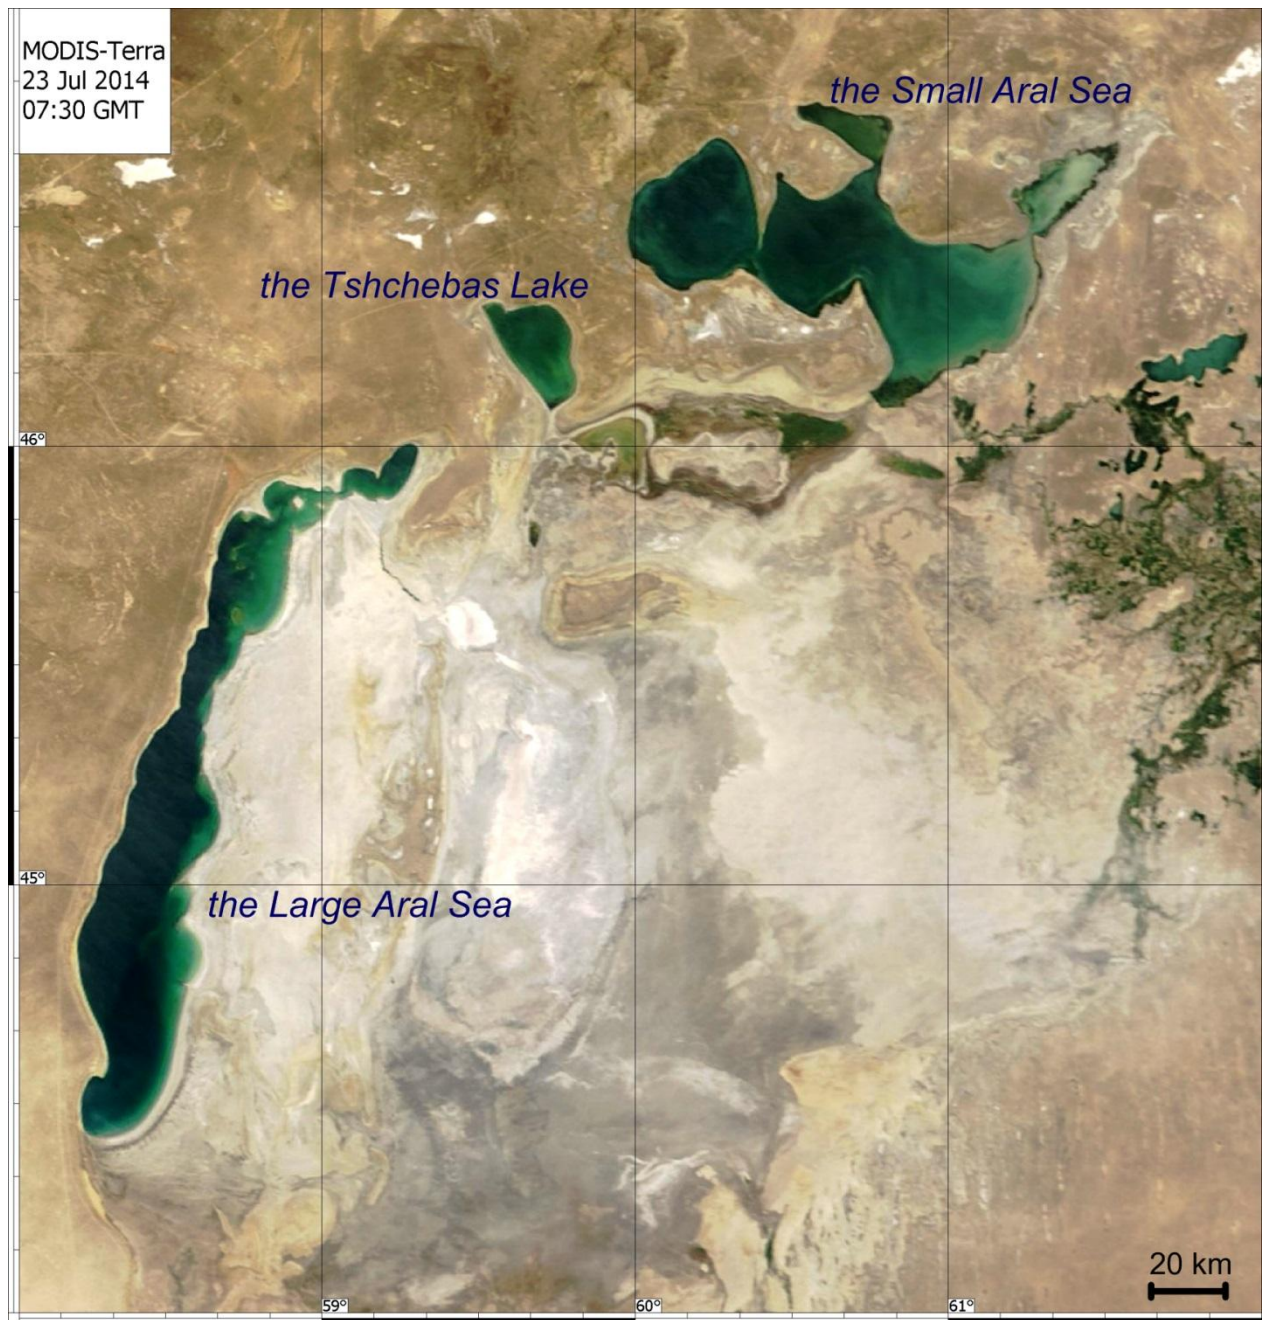

**Supplementary Fig. S1.** MODIS-Terra satellite image of the Aral Sea. Episodic release of water from the Small Aral through the Kokaral Dike towards Lake Tshchebas is observed. Figure was created with Nasa Worldview (<https://earthdata.nasa.gov/labs/worldview/>) and modified with Surfer 12 software (<http://www.goldensoftware.com/>).

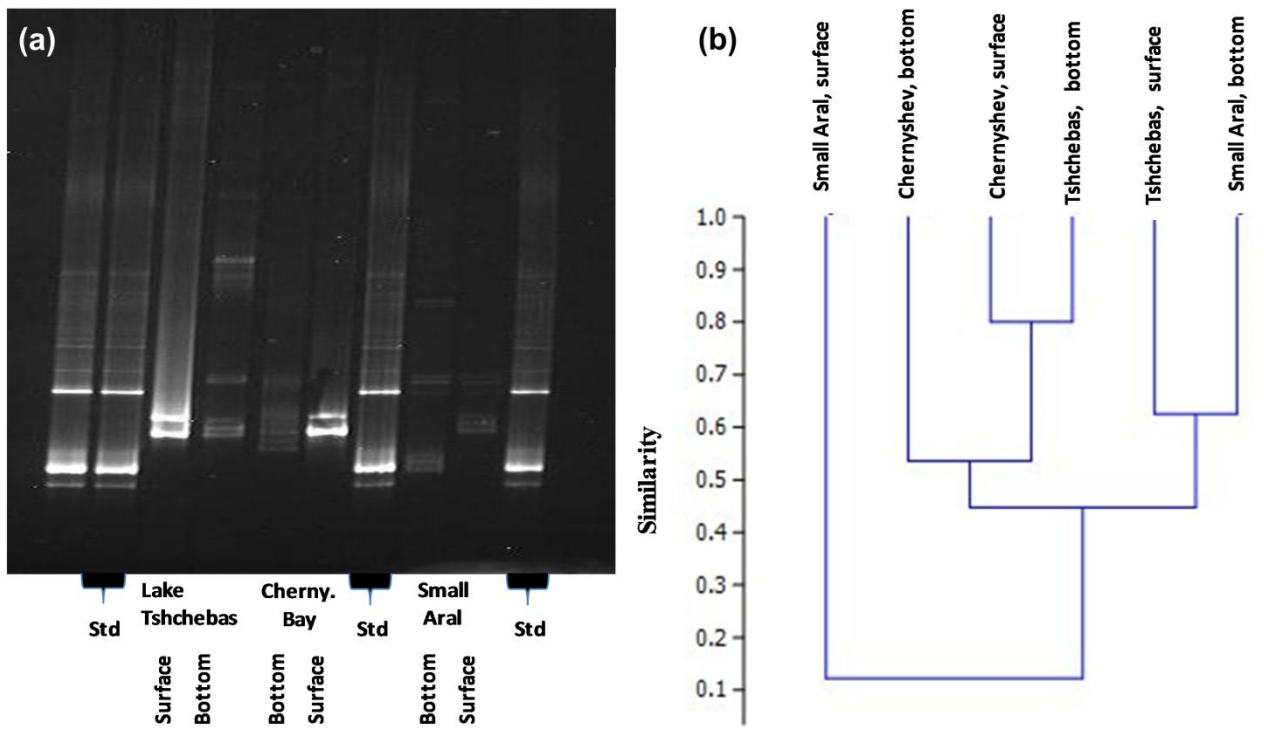

**Supplementary Fig. S2.** (a) DGGE analysis of Archaea communities in surface and bottom samples of the 3 sampled Aral basins: Lake Tshchebas, Chernyshev Bay (Large Aral Sea), Small Aral Sea; Std: standard. (b) Cluster analysis of DGGE banding pattern.

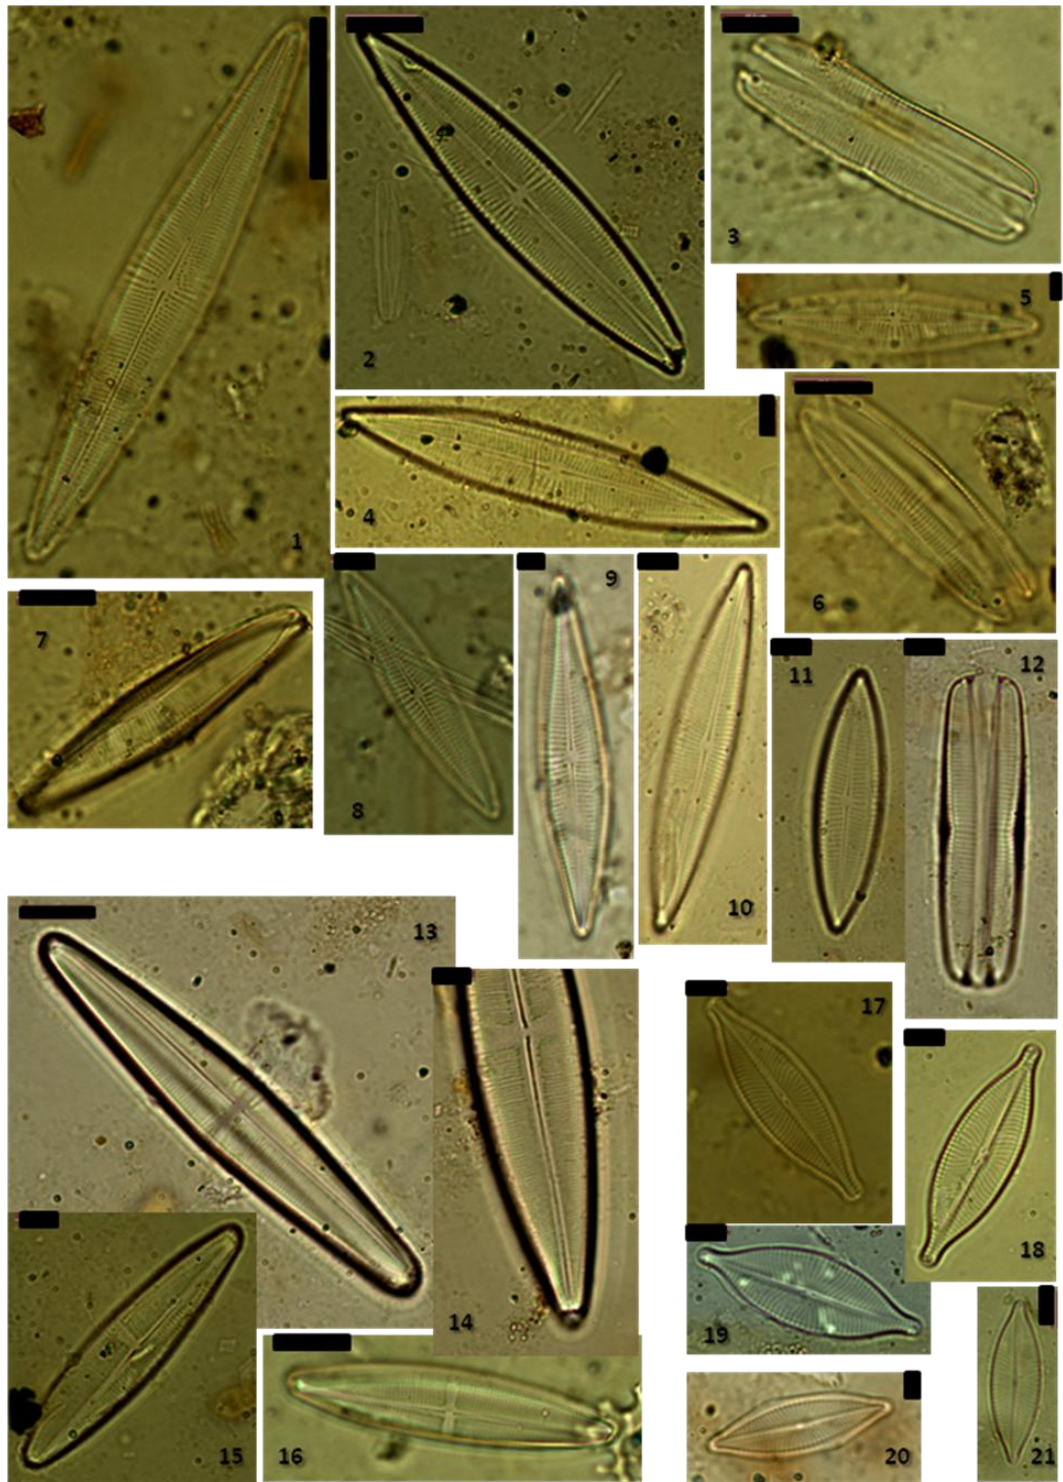

**Supplementary Fig. S3.** Mass and common species of diatoms from the Small Aral Sea taxocene group (frustles): 1-12 - *Parlibellus cruciculoides*, 13-16 – *Stauroneis salina*, 17-21 – *Navicula salinarum*. Scales: 20 mkm – 1; 10 mkm – 2, 3, 6, 7, 13, 16; 5 mkm – 4, 8, 10, 11, 12, 14, 15, 17, 18, 19, 21; 2 mkm – 9, 20.

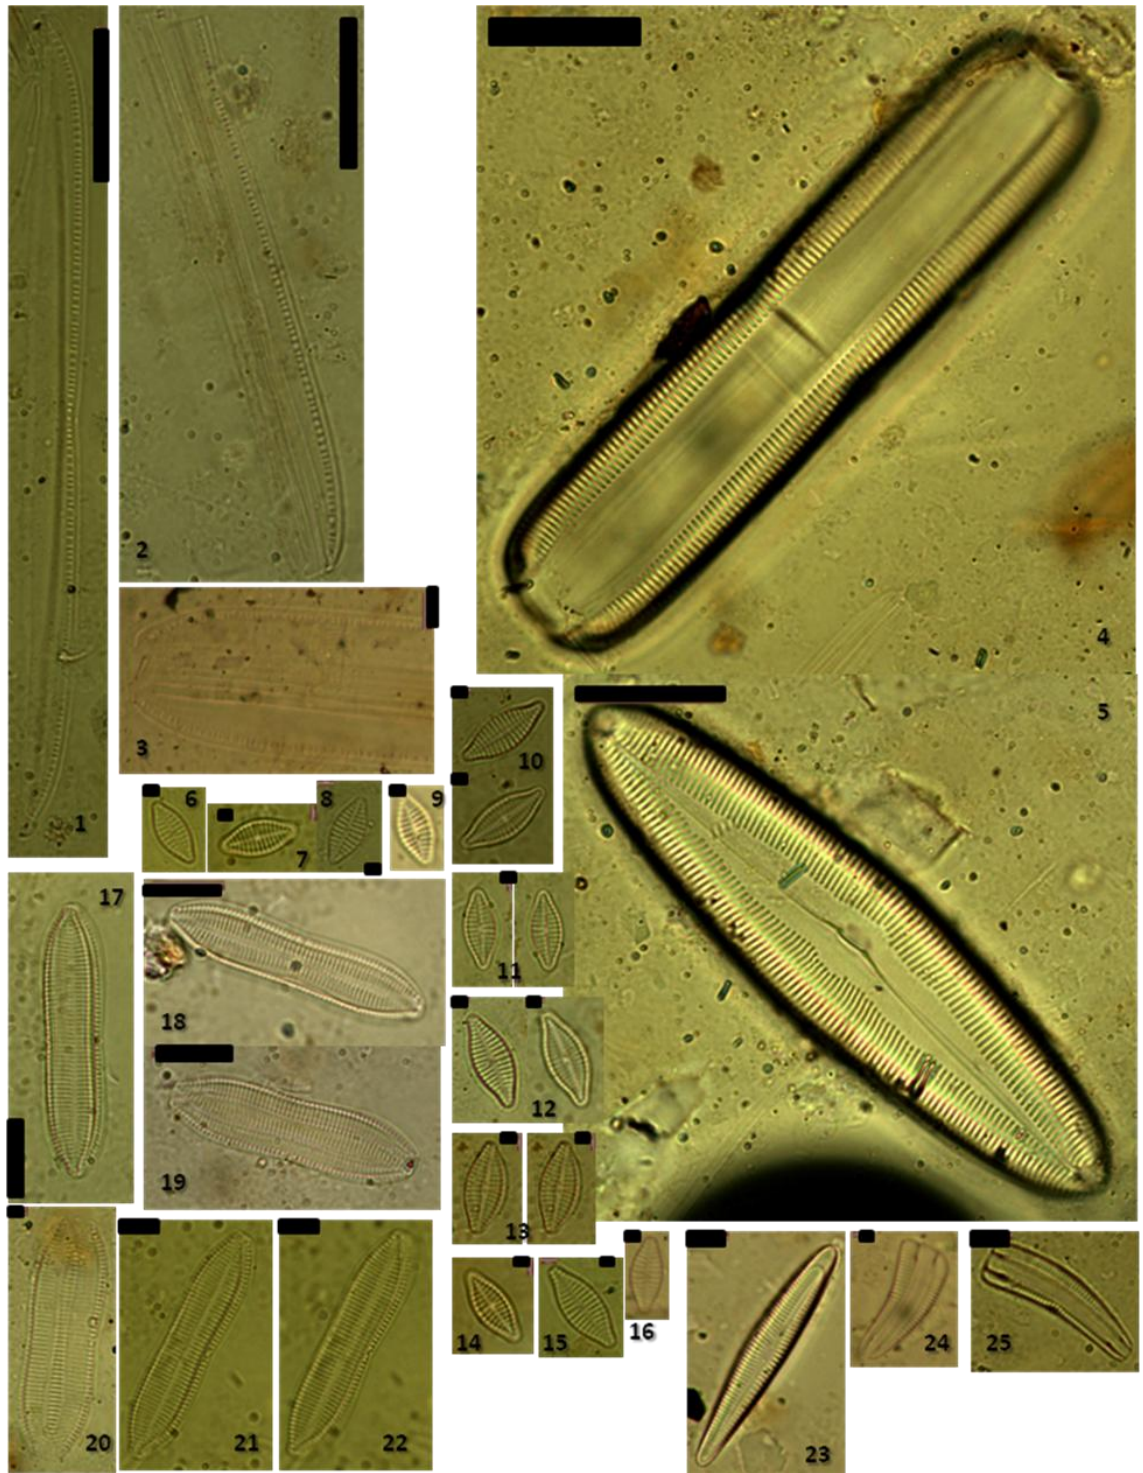

**Supplementary Fig. S4.** Mass and common species of diatoms from the Small Aral Sea taxocene group (frustles): 1-3 – *Nitzschia lagunae*, 4, 5 – *Pinnularia rupestris*, 6-16 – *Planothidium engelbrechtii*, 17-22 – *Tryblionella apiculata*, 23-25 – *Rhoicosphenia abbreviata*. Scales: 20 mkm – 1, 2, 4, 5; 10 mkm – 17, 18, 19; 5 mkm – 3, 21, 22, 23, 25; 2 mkm – 6-16, 20, 24.

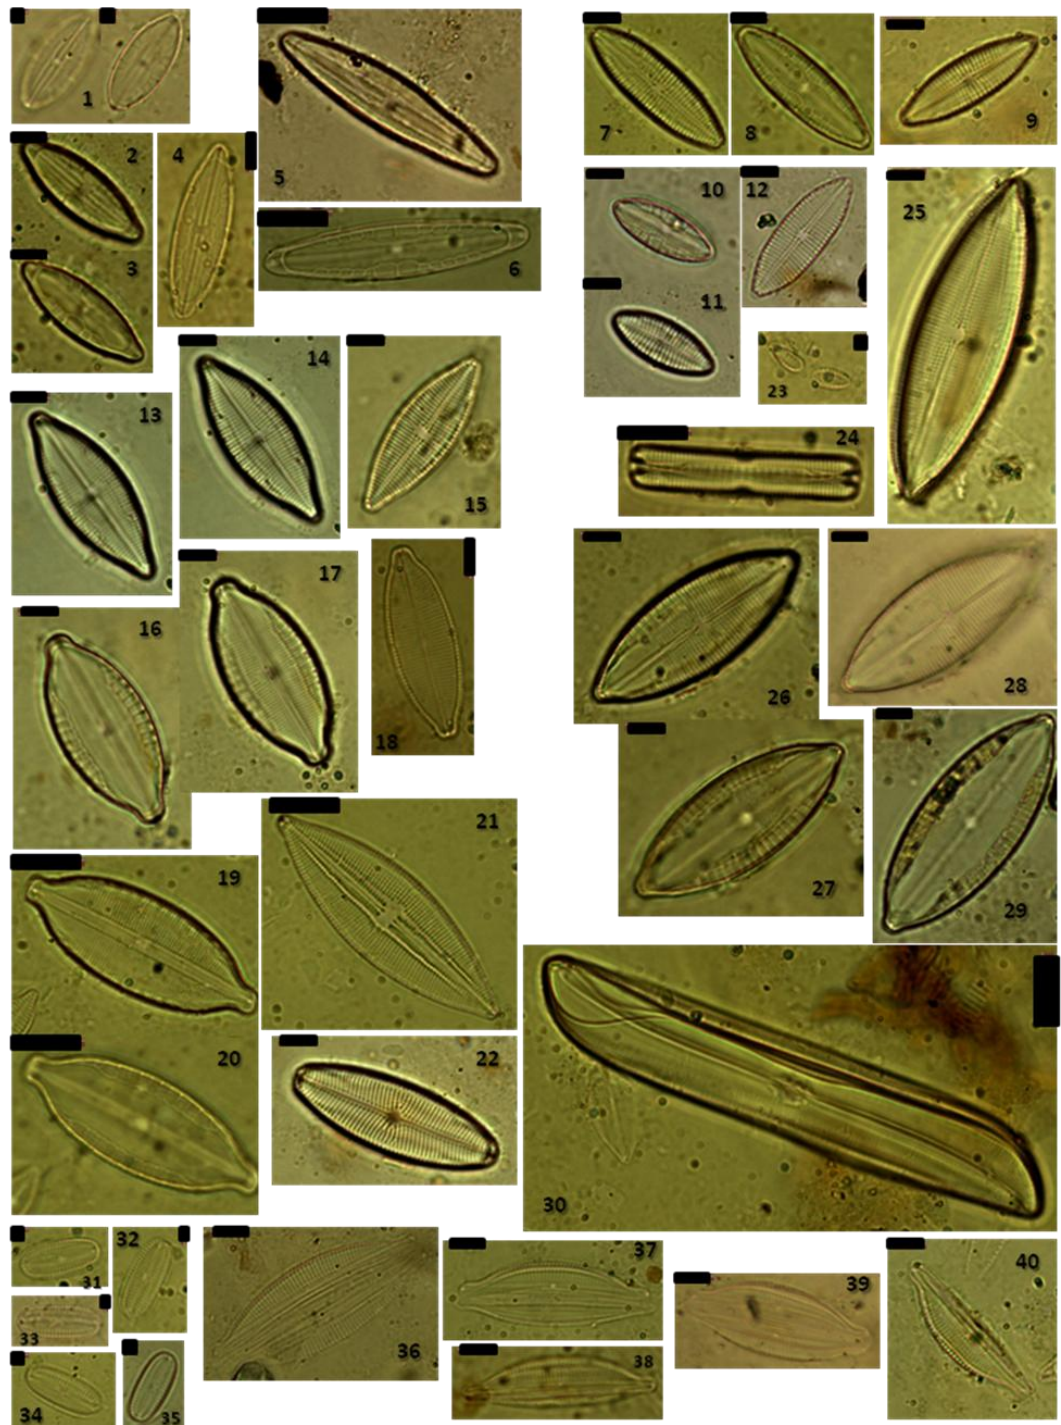

**Supplementary Fig. S5.** Mass and common species of diatoms from the Small Aral Sea taxocene group (frustles): 1-6 – *Mastogloia pumila*, 7-12 – *Mastogloia pusilla*, 13-15 – *Mastogloia smithii*, 16-20 – *Mastogloia baltica*, 21 – *Mastogloia belaensis*, 22 – *Mastogloia elliptica* var. *densei*, 23 – *Martyana atomus*, 24-29 – *Mastogloia lanceolata*, 30 - *Gyrosigma fenestratum*, 31-35 – *Fallacia tenera*, 36-38, 40 – *Halamphora tumida*, 39 – *Amphora holsaticoides*. Scales: 10 mkm – 5, 6, 19, 20, 21, 24, 30; 5 mkm – 2- 4, 7-18, 22, 25-29, 36-40; 2 mkm – 1, 23, 31-35.

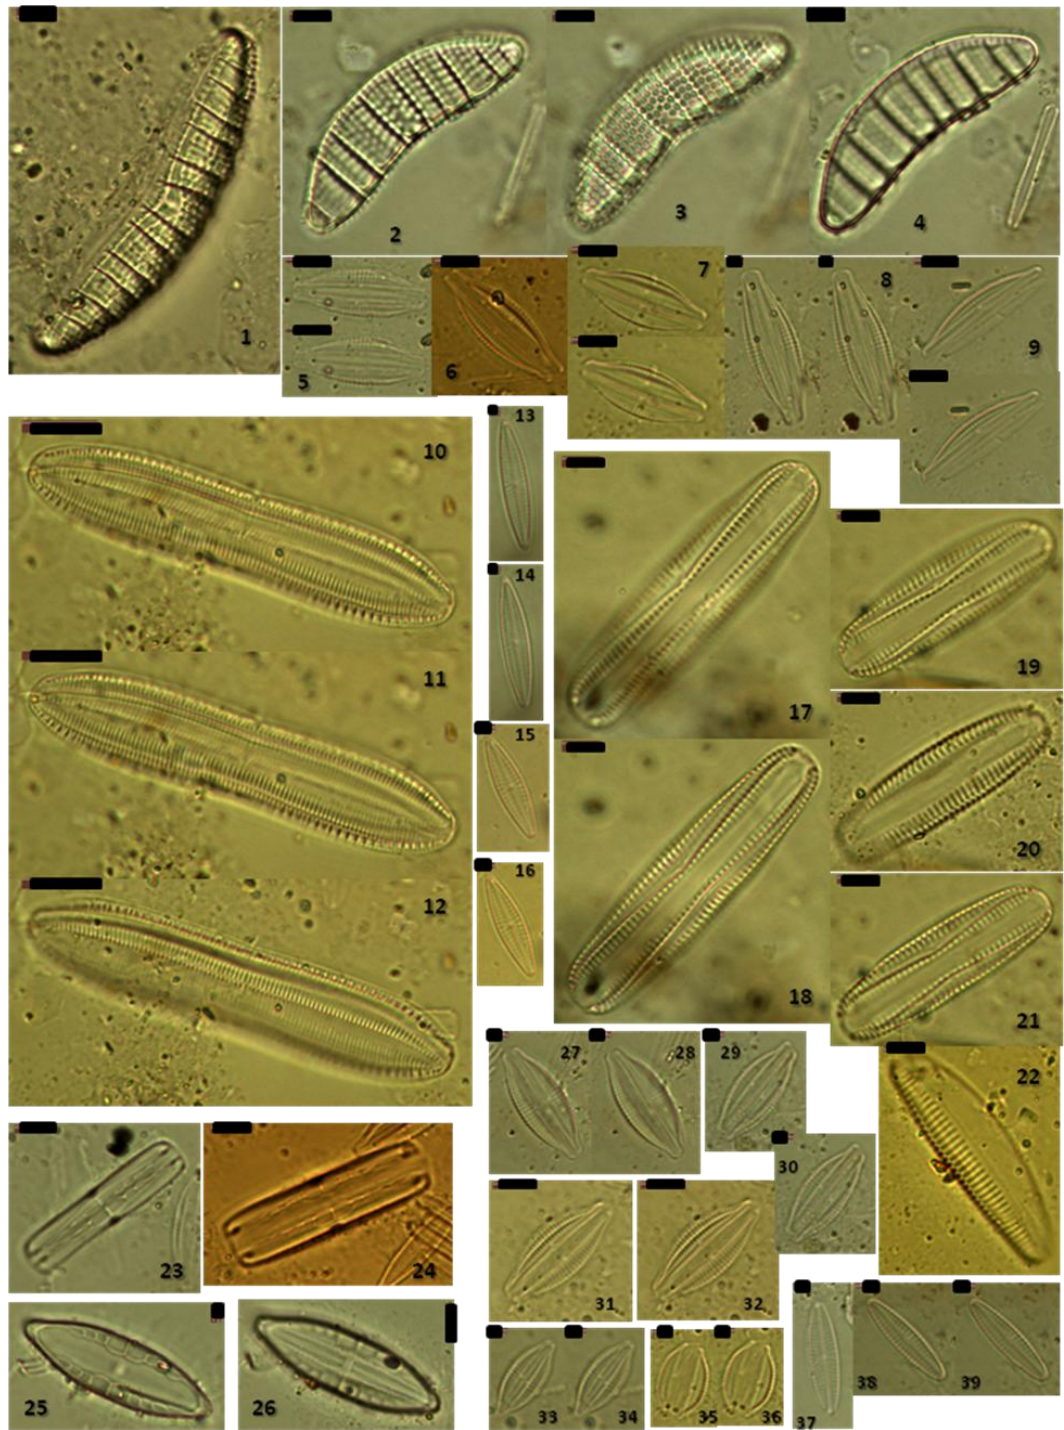

**Supplementary Fig. S6.** Mass and common species of diatoms from Tshchebas Lake taxocene group (frustles): 1-4 – *Epithemia adnata*, 5-9, 27-32 – *Halamphora acutiuscula*, 10-12 – *Tryblionella hungarica*, 13-16 – *Navicula cryptotenella*, 17-22 – *Amphora pusio*, 23-26 – *Mastogloia pumila*, 33-36 – *Halamphora borealis*, 37-39 – *Navicula* sp. 1 Scale: 10 mkm – 10-12; 5 mkm – 1-7, 9, 17-24, 26, 31, 32; 2 mkm – 8, 15, 16, 25, 27-30, 33-39; 1 mkm – 13, 14.

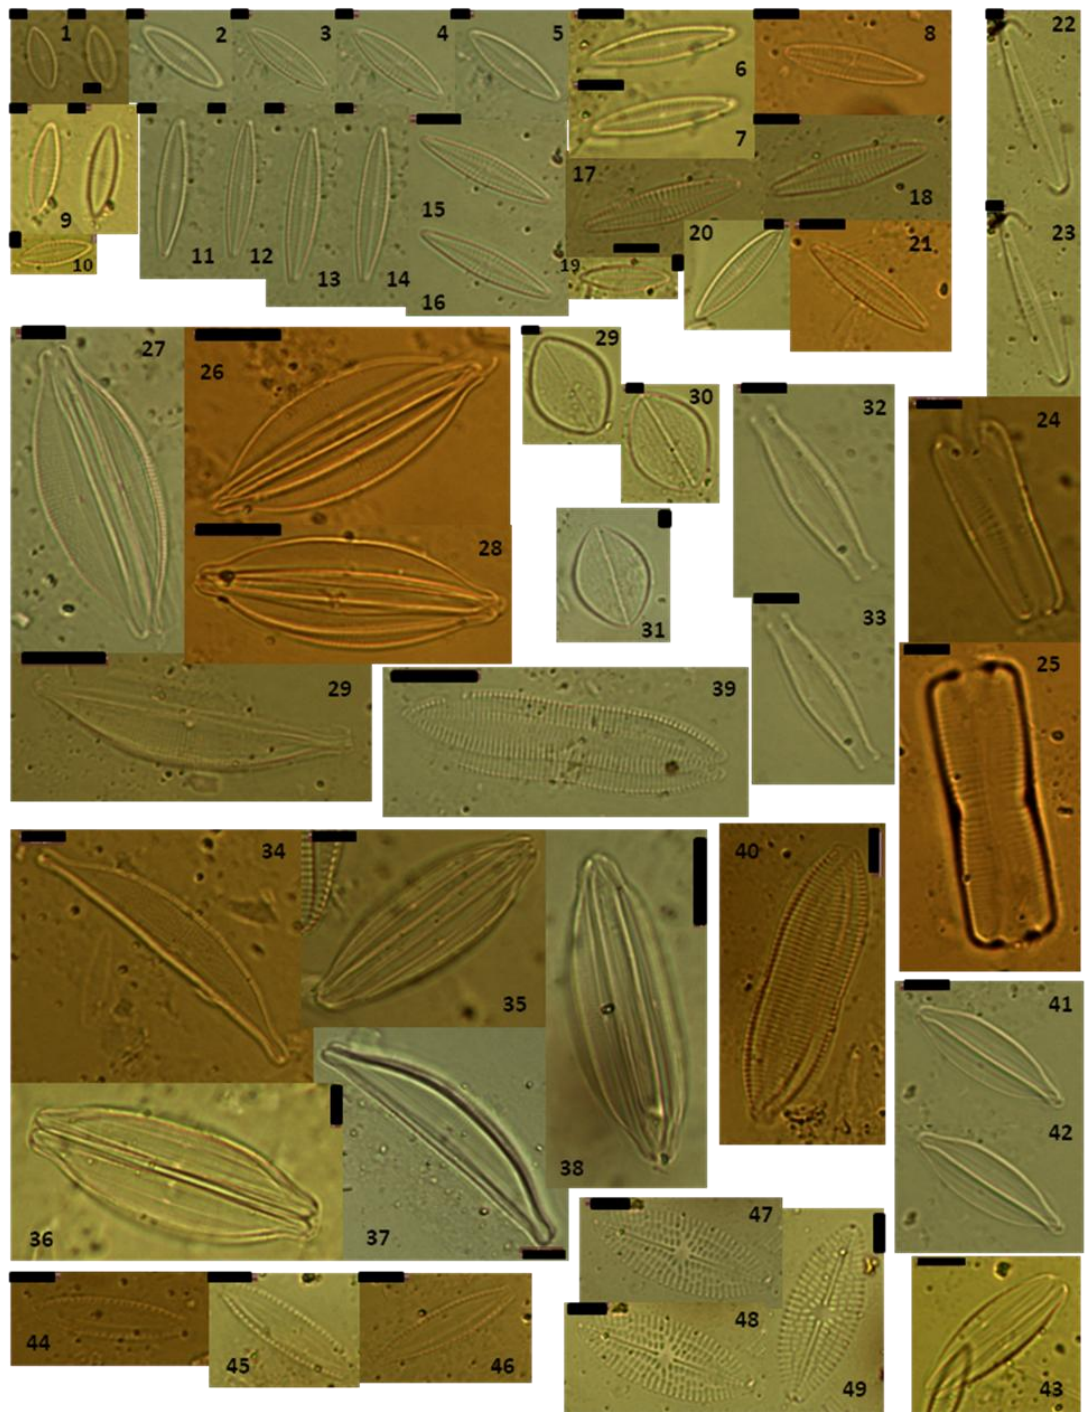

**Supplementary Fig. S7.** Mass and common species of diatoms from Tshchebas Lake taxocene group (frustles): 1-21 – *Navicula cryptotenella*, 22-25 – *Stauronella* sp. 1, 26-29 - *Halamphora subholsatica*, 29-31 – *Cocconeis placentula* var. *euglypta*, 32-33 – *Halamphora dusenii*, 34-38 – *Amphora holsaticoides*, 39, 40 – *Tryblionella apiculata*, 41-43 – *Halamphora normanii*, 44-46 – *Nitzschia liebetruthii* var. *major*, 47-49 – *Aneumastus* sp. 1 (*A. aff minor*). Scale: 10 mkm – 26, 28, 29, 38, 39; 5 mkm – 6-8, 15-18, 21, 24, 25, 27, 32-36, 41-49; 2 mkm – 1-5, 9-14, 19, 20, 22, 23, 29-31.



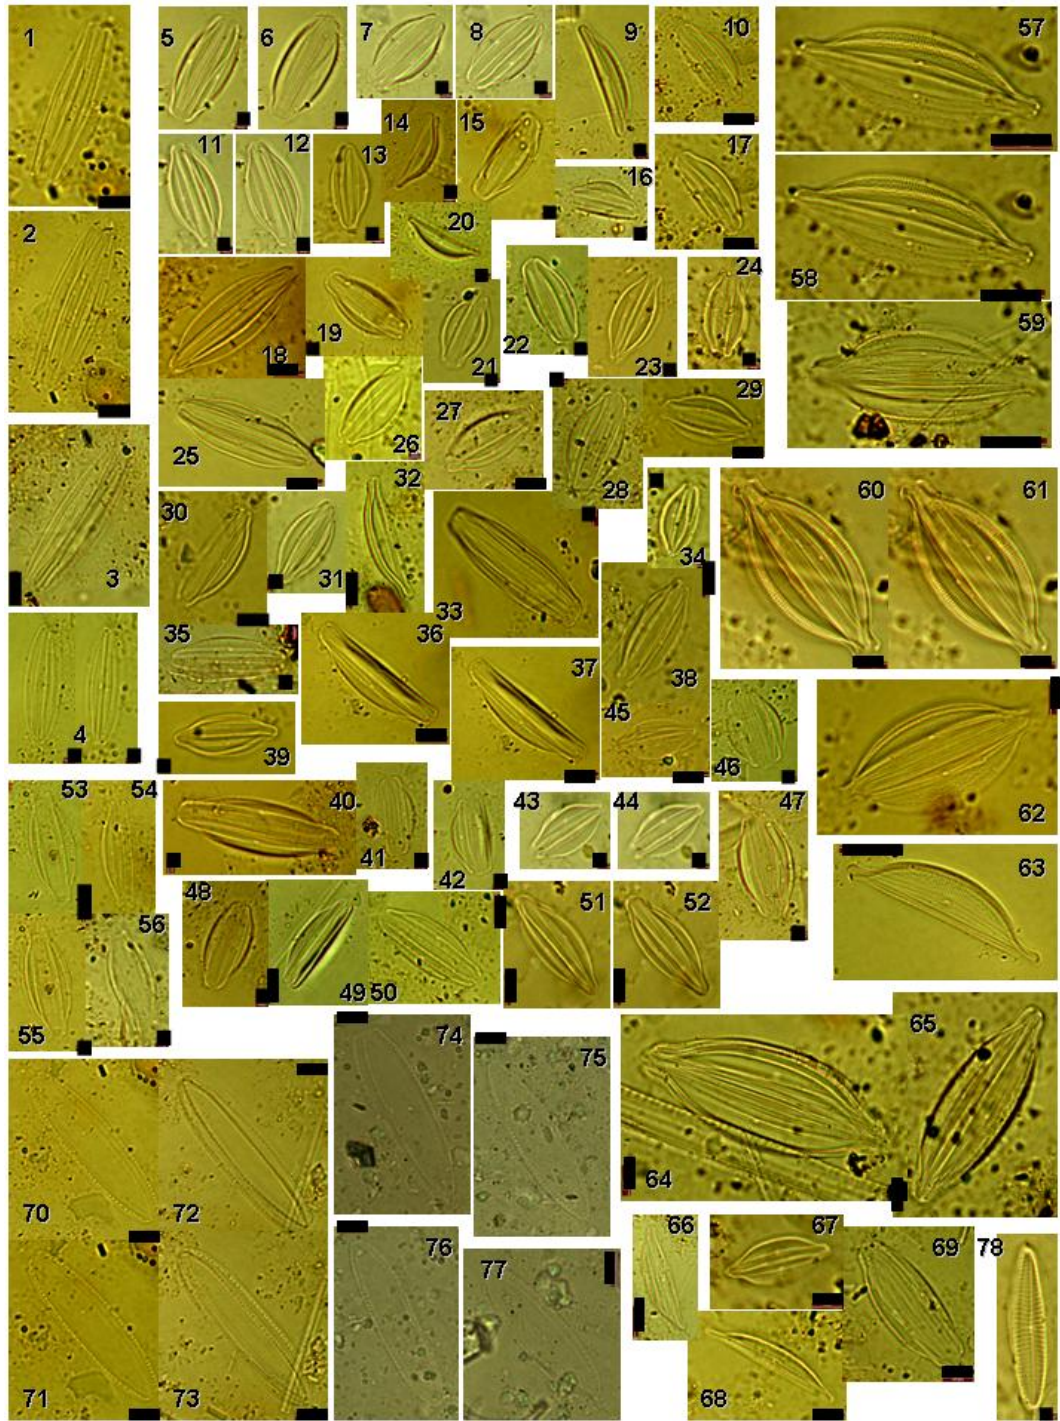

**Supplementary Fig. S8.** Mass and common species of diatoms from the Large Aral Sea taxocene group: 1-3 *Brachysira styriaca*, 4 – *Brachysira zellensis*, 5-52 – *Halamphora normanii*, 53-56 – *Halamphora acutiuscula*, 57-63 – *Halamphora cymbifera*, 64,65 – *Amphora holsaticoides*, 66-69 – *Amphora pseudoholsatica*, 70-77 – *Nitzschia communis*, 78 – *Navicula radiosafallax*. Scales: 10 mkm – 57-59, 63; 5 mkm - 1-3, 10, 17, 18, 25, 27, 29-32, 36, 37, 45, 49-53, 60-62, 64-69, 70-77; 2 mkm – 4-9, 11-16, 19-24, 26, 28, 31, 33-35, 39-44, 46-48, 55, 56, 78.

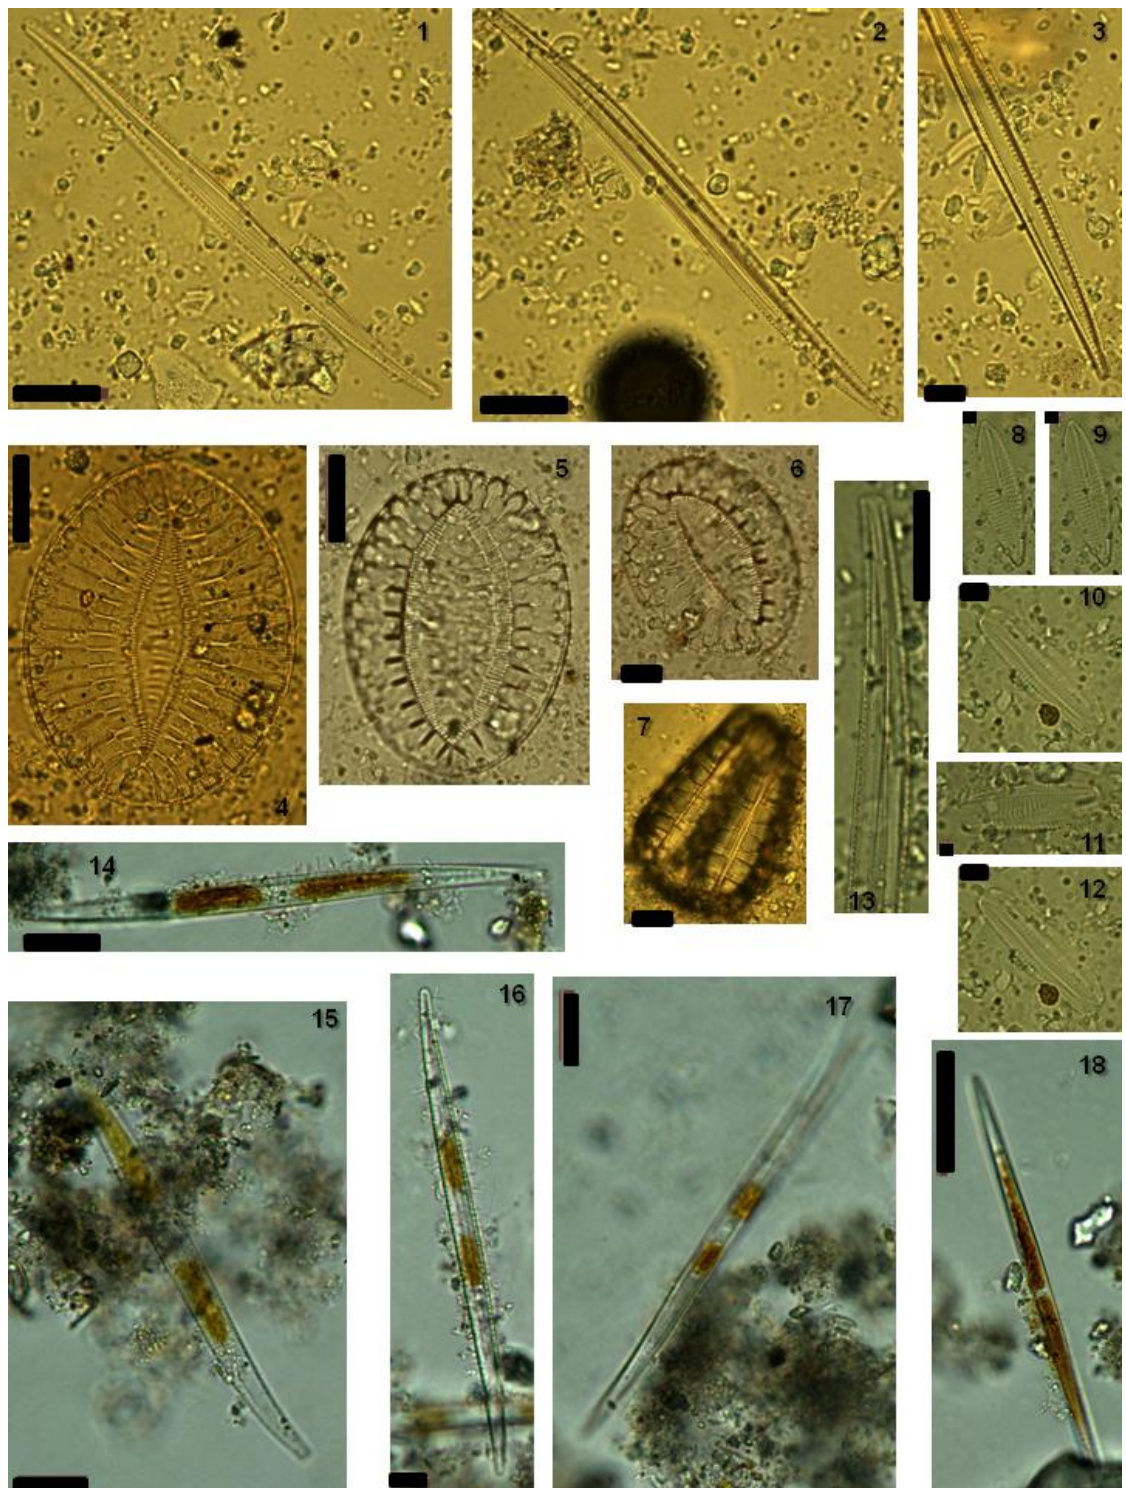

**Supplementary Fig. S9.** Mass and common species of diatoms from the Large Aral Sea taxocene group (frustles and living cells): 1-3, 13-18 – *Nitzschia sigmaformis* (1-3, 13 – frustles, 14-18 – living cells), 4-7 – *Surirella fastuosa*, 8-12 – *Navicula radiosafallax*. Scales: 20 mkm – 1, 2, 4, 5, 13, 14, 18; 10 mkm – 6, 7, 15, 17 ; 5 mkm – 3, 10, 12, 16; 2 mkm – 8, 9, 11.

**Supplementary Table S1.** Microphytobenthos samples from the Aral Sea, collected in October 2014. Basins are referred to as: WB – Western Basin of the Large Aral Sea, ChB –Chernyshov Bay, TL – Tshchebas Lake, and SAS – the Small Aral Sea.

| №  | Water basin | The name of the sample | Coordinates                    | Depth, m | Ground                       | Mineralization, ppt | T, °C | Data       |
|----|-------------|------------------------|--------------------------------|----------|------------------------------|---------------------|-------|------------|
| 1  | WB          | WAS850smSILT           | N45°4'16,26"<br>E58°23'7,37"   | 8,5      | Silt                         | 115,4               | 14,4  | 06.10.2014 |
| 2  | WB          | WAS5smCLAY             | N45°5'34,22"<br>E58°20'25,35"  | 0,05     | Clay                         | 115,4               | 15,2  | 07.10.2014 |
| 3  | WB          | WAS20smCLAY            | N45°5'21,44"<br>E58°20'10,71"  | 0,2      | Clay                         | 115,4               | 15,0  | 07.10.2014 |
| 4  | WB          | WAS0smCLAY2            | N45°5'21,96"<br>E58°20'9,28"   | 0        | Clay                         | 115,4               | 15,2  | 07.10.2014 |
| 5  | WB          | WAS0smCLAY1            | N45°5'34,30"<br>E58°20'24,85"  | 0        | Clay                         | 115,4               | 15,2  | 07.10.2014 |
| 6  | WB          | WAS5smCLAY1            | N45°6'2,67"<br>E58°21'0,73"    | 0,05     | Clay                         | 115,4               | 15,2  | 08.10.2014 |
| 7  | WB          | WAS5smSTONE2           | N45°5'52,90"<br>E58°20'48,52"  | 0,05     | Stone                        | 115,4               | 15,2  | 08.10.2014 |
| 8  | WB          | WAS5smSAND1            | N45°6'8,11"<br>E58°21'1,27"    | 0,05     | Sand                         | 115,4               | 15,2  | 08.10.2014 |
| 9  | WB          | WAS5smSTONE1           | N45°5'41,06"<br>E58°20'38,32"  | 0,05     | Stone                        | 115,4               | 15,2  | 08.10.2014 |
| 10 | WB          | WAS0smSHELL            | N45°5'36,13"<br>E58°20'29,48"  | 0        | Shell                        | 115,4               | 15,2  | 08.10.2014 |
| 11 | ChB         | WASChB0smSAND          | N45°49'19,56"<br>E59°13'33,32" | 0        | Sand                         | 115,4               | 11,8  | 22.10.2014 |
| 12 | TL          | TL0smONFIL             | N46°19'17,66"<br>E59°40'20,61" | 0        | Surface of filamentous algae | 91,9                | 10,3  | 23.10.2014 |
| 13 | TL          | TL20smSAND             | N46°19'17,52"<br>E59°40'20,75" | 0,2      | Sand                         | 91,9                | 10,3  | 23.10.2014 |
| 14 | TL          | TL0smunderFILSAND      | N46°19'17,66"<br>E59°40'20,61" | 0        | Sand under filamentous algae | 91,9                | 10,3  | 23.10.2014 |
| 15 | TL          | TL30smSAND             | N46°19'17,44"<br>E59°40'20,88" | 0,3      | Sand                         | 91,9                | 10,3  | 23.10.2014 |
| 16 | TL          | TL15smSAND             | N46°19'17,54"<br>E59°40'20,70" | 0,15     | Sand                         | 91,9                | 10,3  | 23.10.2014 |
| 17 | SAS         | SAS0smOSILT            | N46°21'40,85"<br>E60°8'44,00"  | 0        | Organic sludge               | 11,1                | 11,6  | 25.10.2014 |
| 18 | SAS         | SAS5smOSILT            | N46°21'43,74"<br>E60°8'44,46"  | 0,05     | Organic sludge               | 11,1                | 11,6  | 25.10.2014 |
| 19 | SAS         | SAS20smOSILT           | N46°21'46,63"<br>E60°8'44,77"  | 0,2      | Organic sludge               | 11,1                | 11,6  | 25.10.2014 |
| 20 | SAS         | SAS30smOSILT           | N46°21'49,30"<br>E60°8'45,08"  | 0,3      | Organic sludge               | 11,1                | 11,6  | 25.10.2014 |
| 21 | SAS         | SAS1200smSILT          | N46°23'48,78"<br>E60°11'23,34" | 12       | Organic sludge               | 11,1                | 11,3  | 25.10.2014 |

**Supplementary Table S2.** Collection of species that characterize diatom community groupings of the Small Aral Sea. Intra-group similarity based on Bray–Curtis dissimilarity index: 22.4%.

| Species                           | Av.Abund | Av.Sim | Sim/SD | Contrib% | Cum.% |
|-----------------------------------|----------|--------|--------|----------|-------|
| <i>Navicula phyllepta</i>         | 0,08     | 4,09   | 1,06   | 18,26    | 18,26 |
| <i>Mastogloia smithii</i>         | 0,05     | 1,86   | 0,66   | 8,28     | 26,54 |
| <i>Mastogloia pusilla</i>         | 0,05     | 1,77   | 0,62   | 7,9      | 34,44 |
| <i>Mastogloia lanceolata</i>      | 0,04     | 1,65   | 0,62   | 7,36     | 41,8  |
| <i>Halamphora tumida</i>          | 0,03     | 1,3    | 0,59   | 5,82     | 47,62 |
| <i>Planothidium engelbrechtii</i> | 0,04     | 1,29   | 0,83   | 5,74     | 53,36 |
| <i>Parlibellus cruciculoides</i>  | 0,03     | 1,28   | 0,6    | 5,73     | 59,1  |
| <i>Navicula salinarum</i>         | 0,02     | 1      | 0,73   | 4,45     | 63,54 |
| <i>Pinnularia rupestris</i>       | 0,02     | 0,89   | 0,62   | 3,95     | 67,49 |
| <i>Mastogloia pumila</i>          | 0,04     | 0,73   | 0,34   | 3,24     | 70,73 |
| <i>Tryblionella hungarica</i>     | 0,03     | 0,7    | 0,41   | 3,13     | 73,86 |
| <i>Tryblionella apiculata</i>     | 0,04     | 0,54   | 0,64   | 2,41     | 76,27 |
| <i>Gyrosigma acuminatum</i>       | 0,01     | 0,44   | 0,5    | 1,96     | 78,23 |
| <i>Rhoicosphenia abbreviata</i>   | 0,02     | 0,43   | 0,52   | 1,93     | 80,16 |
| <i>Pleurosigma salinarum</i>      | 0,01     | 0,43   | 0,51   | 1,9      | 82,06 |
| <i>Fallacia tenera</i>            | 0,02     | 0,41   | 0,39   | 1,83     | 83,88 |
| <i>Amphora holsaticoides</i>      | 0,01     | 0,35   | 0,41   | 1,55     | 85,44 |
| <i>Nitzschia lagunae</i>          | 0,01     | 0,35   | 0,41   | 1,55     | 86,99 |
| <i>Mastogloia baltica</i>         | 0,01     | 0,23   | 0,9    | 1,04     | 88,03 |
| <i>Seminavis strigosa</i>         | 0,01     | 0,19   | 1,14   | 0,83     | 88,86 |
| <i>Amphora commutata</i>          | 0        | 0,17   | 1,15   | 0,76     | 89,62 |
| <i>Stauroneis salina</i>          | 0,02     | 0,17   | 1,15   | 0,76     | 90,38 |

**Supplementary Table S3.** Collection of species that characterize diatom community groupings of Tshchebas Lake. Intra-group similarity based on Bray–Curtis dissimilarity index: 45.67%.

| Species                                             | Av.Abund | Av.Sim | Sim/SD | Contrib% | Cum.% |
|-----------------------------------------------------|----------|--------|--------|----------|-------|
| <i>Halamphora acutiuscula</i>                       | 0,14     | 9,18   | 1,5    | 20,11    | 20,11 |
| <i>Navicula cryptotenella</i>                       | 0,14     | 7,11   | 0,83   | 15,57    | 35,68 |
| <i>Halamphora dusenii</i>                           | 0,07     | 5,81   | 5,52   | 12,72    | 48,4  |
| <i>Amphora holsaticoides</i>                        | 0,08     | 5,61   | 1,14   | 12,28    | 60,67 |
| <i>Cocconeis placentula</i> var.<br><i>euglypta</i> | 0,09     | 4,56   | 1,11   | 9,99     | 70,66 |
| <i>Halamphora cymbifera</i>                         | 0,05     | 2,86   | 1,13   | 6,26     | 76,92 |
| <i>Mastogloia pumila</i>                            | 0,08     | 2,61   | 0,68   | 5,71     | 82,63 |
| <i>Amphora pusio</i>                                | 0,06     | 1,99   | 0,53   | 4,35     | 86,98 |
| <i>Nitzschia liebetruithii</i> var.<br><i>major</i> | 0,04     | 1,92   | 0,84   | 4,2      | 91,18 |

**Supplementary Table S4.** Collection of species that characterize diatom community groupings of the Large Aral Sea. Intra-group similarity based on Bray–Curtis dissimilarity index: 42.13%.

| Species                      | Av.Abund | Av.Sim | Sim/SD | Contrib% | Cum.% |
|------------------------------|----------|--------|--------|----------|-------|
| <i>Nitzschia communis</i>    | 0,26     | 16,24  | 1,67   | 38,54    | 38,54 |
| <i>Nitzschia sigmaformis</i> | 0,25     | 14,39  | 1,17   | 34,16    | 72,7  |
| <i>Halamphora normanii</i>   | 0,12     | 4,23   | 0,49   | 10,03    | 82,73 |
| <i>Halamphora cymbifera</i>  | 0,08     | 2,53   | 0,59   | 6        | 88,73 |
| <i>Navicula radosafallax</i> | 0,06     | 1,86   | 0,56   | 4,43     | 93,15 |

**Supplementary Table S 5.** Diatom taxocene diversity (Shannon-Wiener index, ( $H'$ )), Pielou's evenness index ( $J'$ ) and the probability of interspecific encounter (PIE - Gini–Simpson index) for the Aral Sea basins.

| Sample          | $H'$      | $J'$      | PIE      |
|-----------------|-----------|-----------|----------|
| WAS850smSILT    | 2,069     | 0,833     | 0,832    |
| WAS5smCLAY      | 1,220     | 0,880     | 0,671    |
| WAS20smCLAY     | 1,088     | 0,785     | 0,604    |
| WAS0smCLAY2     | 0,921     | 0,839     | 0,539    |
| WAS0smCLAY1     | 1,784     | 0,812     | 0,775    |
| WAS5smCLAY1     | 1,156     | 0,718     | 0,583    |
| WAS5smSTONE2    | 1,644     | 0,845     | 0,767    |
| WAS5smSAND1     | 1,393     | 0,778     | 0,691    |
| WAS5smSTONE1    | 1,844     | 0,839     | 0,810    |
| WAS0smSHELL     | 1,784     | 0,917     | 0,809    |
| WASChB0smSAND   | 1,733     | 0,967     | 0,813    |
| TL0smONFIL      | 1,956     | 0,941     | 0,845    |
| TL20smSAND      | 2,166     | 0,941     | 0,867    |
| TL0smundFILSAND | 2,607     | 0,920     | 0,911    |
| TL30smSAND      | 2,659     | 0,873     | 0,908    |
| TL15smSAND      | 2,094     | 0,843     | 0,848    |
| SAS0smOSILT     | 2,796     | 0,869     | 0,924    |
| SAS5smOSILT     | 2,776     | 0,781     | 0,917    |
| SAS20smOSILT    | 3,908     | 0,811     | 0,962    |
| SAS30smOSILT    | 3,424     | 0,798     | 0,952    |
| SAS1200smSILT   | 2,120     | 0,921     | 0,858    |
| Basin           | $H'$ mean | $J'$ mean | PIE mean |
| Large Aral Sea  | 1,512     | 0,837     | 0,718    |
| Tshchebas Lake  | 2,297     | 0,904     | 0,876    |
| Small Aral Sea  | 3,005     | 0,836     | 0,923    |

**Supplementary Table S 6.** Summary of primary characteristics observed in the basins of the Aral Sea in October, 2014.  $H'$  – Shannon-Wiener index of diatom taxocene diversity.

| <i>Basin</i>                | <i>Salinity maximum, g/kg</i> | <i>Stratification</i> | <i>Surface level</i> | <i><math>H'</math></i> | <i>Biodiversity</i> |
|-----------------------------|-------------------------------|-----------------------|----------------------|------------------------|---------------------|
| Western Large Aral          | 121.5                         | strong                | falling              | 1.5                    | low                 |
| Chernyshev bay              | > 133                         | extremely strong      |                      |                        |                     |
| Lake Tshchebas              | 92                            | slightly stratified   | fluctuating          | 2.3                    | moderate            |
| Small Aral (Shevchenko bay) | 11                            | mixed                 | relatively stable    | 3                      | most diverse        |
